# Supplementary material for: Palmitoylethanolamide Modulation of Microglia Activation: Characterization of Mechanisms of Action and Implication for Its Neuroprotective Effects
Source: MDPI journal article supplement (doi:10.3390/ijms22063054), 2021-03-17
Supplement: s1 [file s1]

**Table S1 Summary of microglia morphology parameters (Skeleton and FracLac analyses)**

|                   | Measure                                                                                      | Unit                                       | Scale           | Interpretation    |
|-------------------|----------------------------------------------------------------------------------------------|--------------------------------------------|-----------------|-------------------|
| Process length    | Summed                                                                                       | μm/cell                                    | Photomicrograph | Cell ramification |
| Process endpoints | Summed                                                                                       | #/cell                                     | Photomicrograph | Cell ramification |
| Fractal Dimension | Regression slope $\left[ \frac{\ln(N)}{\ln(\varepsilon)} \right]$                            | D <sub>B</sub>                             | Individual cell | Cell complexity   |
| Span Ratio        | $\frac{\text{convex hull eclipse longest length}}{\text{convex hull eclipse longest width}}$ | Ratio                                      | Individual cell | Cell shape        |
| Density           | $\frac{\# \text{ of pixels within cell outline}}{\text{area of convex hull}}$                | $\frac{\# \text{ of pixels}}{\text{area}}$ | Individual cell | Cell size         |
| Area              | Total number of pixels present in the filled shape of cell image                             | μm <sup>2</sup>                            | Individual cell | Cell size         |
| Perimeter         | # of pixels expressed in microns                                                             | μm                                         | Individual cell | Cell size         |
| Lacunarity        | heterogeneity or translational and rotational invariance in a shape                          | mass distribution of pixels                | Individual cell | Shape changing    |
| Circularity       | $\frac{(4\pi \times \text{cell area})}{(\text{cell perimeter})^2}$                           | Ratio                                      | Individual cell | Cell shape        |
